# Supplementary material for: Environment-friendly acids for leaching transition metals from spent-NMC532 cathode and sustainable conversion to potential anodes
Source: Royal Society of Chemistry journal article supplement (doi:10.1039/d4su00209a), 2024-01-01
Supplement: d4su00209a1.pdf [file d4su00209a1.pdf]

**Electronic Supporting Information**

**Environment friendly acids for leaching transition metals from spent-NMC532 cathode and sustainable conversion to potential anodes**

**Anjali V Nair, Silpasree S Jayasree<sup>#</sup>, Dona Susan Baji, Shantikumar Nair and  
Dhamodaran Santhanaganalan\***

*Amrita School of Nanosciences and Molecular Medicine, Amrita Vishwa Vidyapeetham, Kochi – 682041, India*

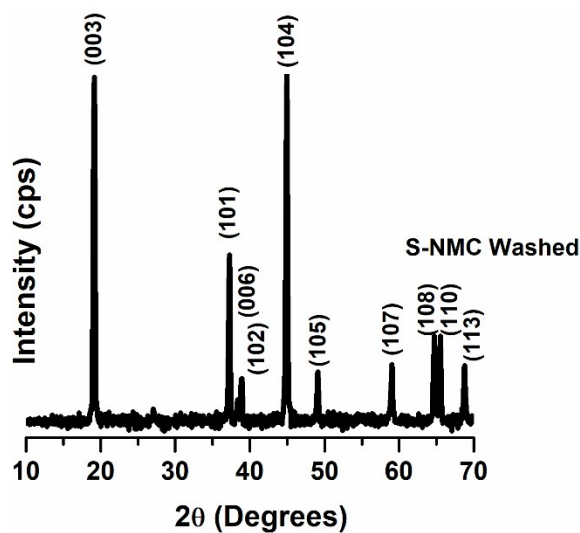

Figure S1. XRD representation of S-NMC532

<sup>#</sup> Present Address: VITO (Flemish Institute for Technological Research), Sustainable Materials, Boeretang 200, 2400 Mol, Belgium.

\*Corresponding Author E-mail:dsgopalan20710@aims.amrita.edu

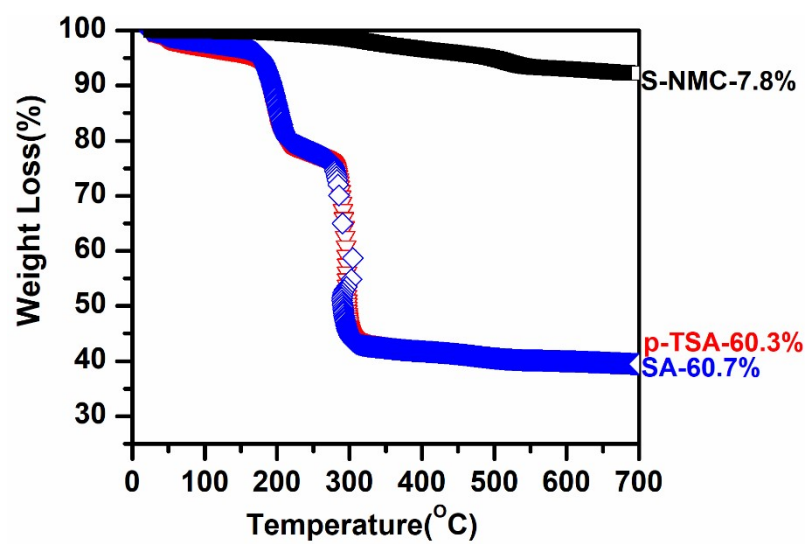

Figure S2. TG analysis of S-NMC, mixed metal oxalates synthesized using different leachants like p-TSA and SA.

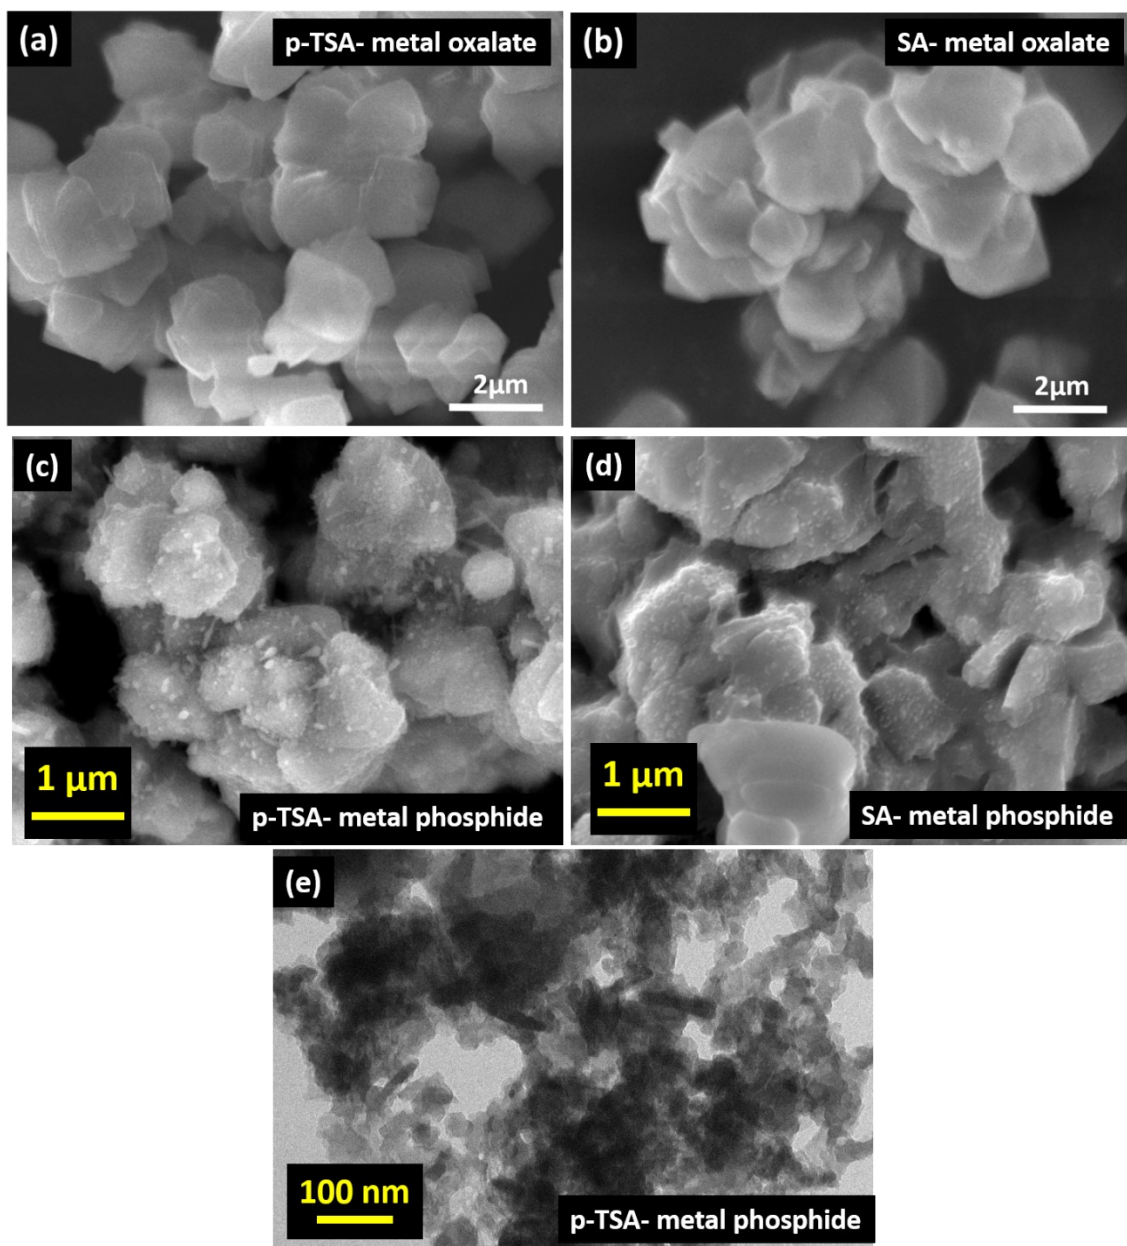

Figure S3. (a) p-TSA derived metal oxalate, (b) SA derived metal oxalate, (c) p-TSA derived metal phosphide, (d) SA derived metal phosphide and (e) p-TSA derived metal phosphide.

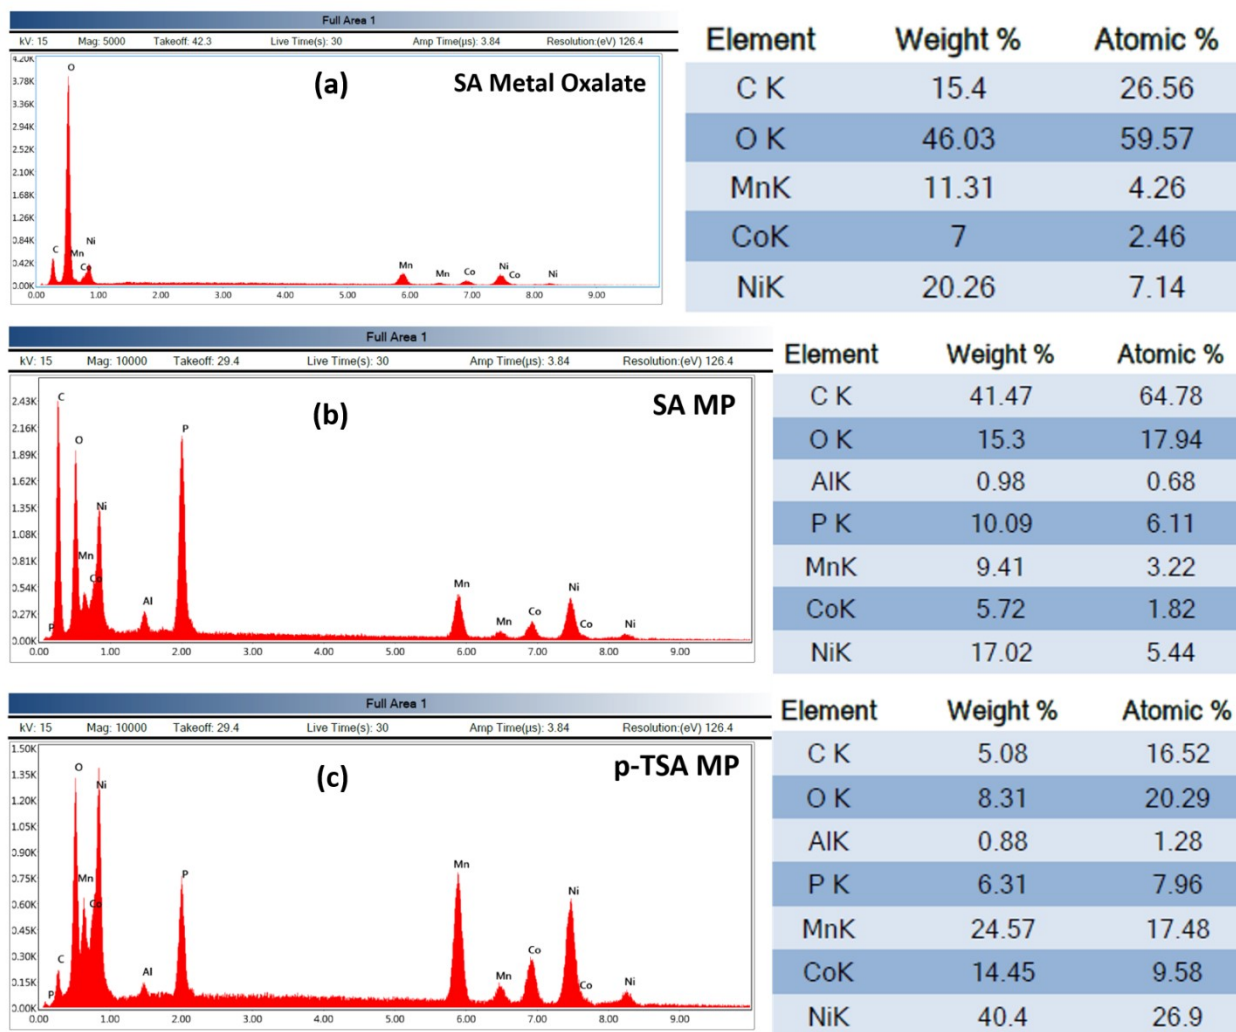

Figure S4. Energy Dispersive X-ray analysis and table of composition of (a) SA derived metal oxalate (b) SA derived metal phosphide and (c) p-TSA derived metal phosphide.

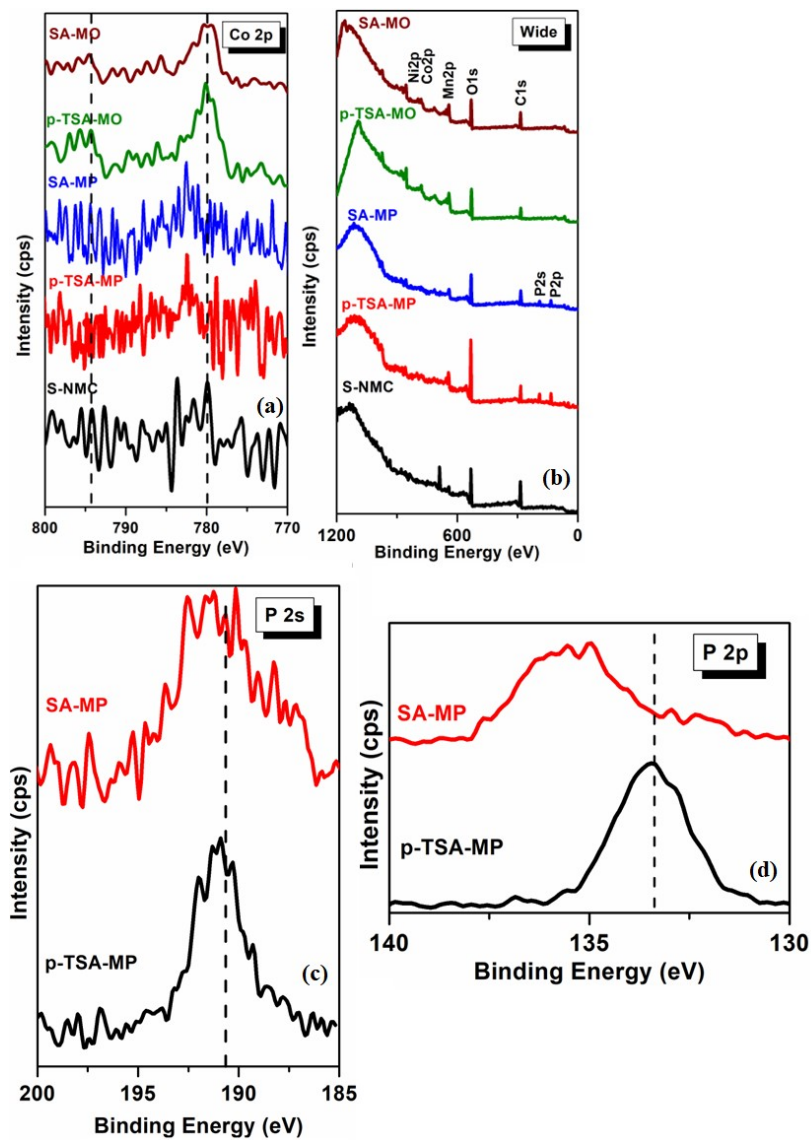

Figure S5. XPS representation of S-NMC, mixed metal phosphides and oxides synthesized using different leachants like p-TSA and SA.
